# Supplementary material
Source: publisher figshare collection journal article supplement (https://springernature.figshare.com/ndownloader/files/20447025)
Supplement: Supplementary file 1 [file 20447025]

**Additional files for:**

**Fault model of the 2012 doublet earthquake, near the up-dip end of the 2011 Tohoku-Oki earthquake, based on a near-field tsunami: Implications for intraplate stress state**

Tatsuya Kubota12, Ryota Hino2, Daisuke Inazu3, Syuichi Suzuki2

1 National Research Institute for Earth Science and Disaster Resilience, 3-1 Tennodai, Tsukuba, Ibaraki, 305-0006, Japan

2 Graduate School of Science, Tohoku University, 6-6 Aza-Aoba, Aramaki, Aoba-ku, Sendai, Miyagi, 980-8578, Japan

3 Department of Marine Resources and Energy, Tokyo University of Marine Science and Technology, 4-5-7 Konan, Minato, Tokyo 108-8477, Japan

Figure S1. Tsunami source model of Inazu and Saito (2014) and the stations used for their inversion analysis. Comparison between the observed and simulated tsunami waveforms at the stations near the source is also shown.

Figure S2. Trade-off curve between the smoothing weight and the VR used for the inversion analysis.

Figure S3**.** Sea-surface height changes from subevent 2 with fault dimensions changed. The left-top panel shows the distribution of the tsunami source model, and others show the sea-surface height distribution of assumed fault models.

Figure S4. Result of the forward calculation of the teleseismic waveforms based on the optimum fault models of (a) subevent 1 and (b) subevent 2.


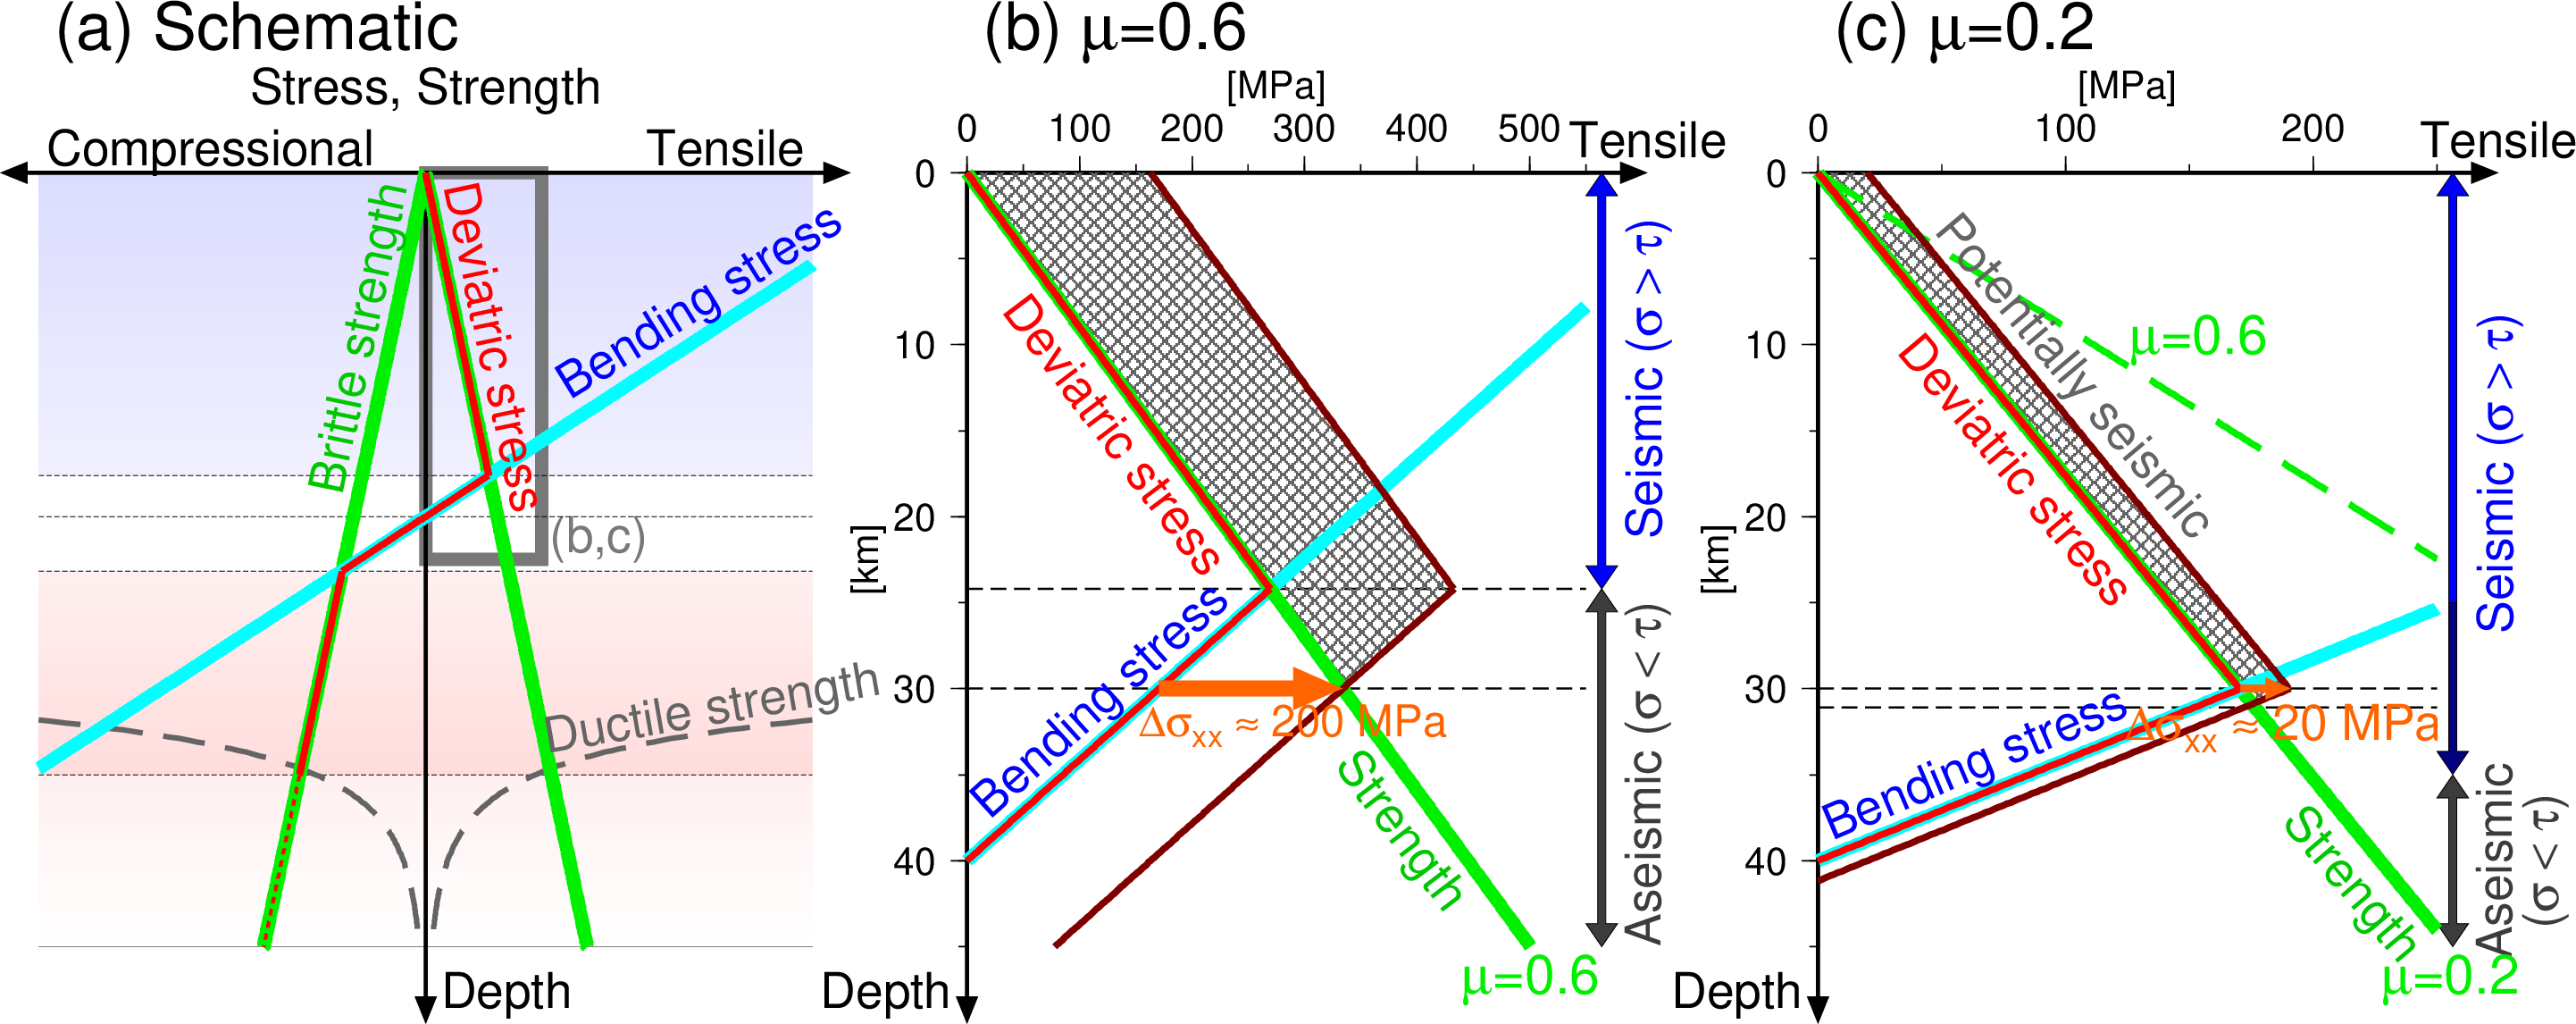


Figure S5. Vertical profile of the strength and the bending stress within the incoming plate, assuming the top depth of elastic core at 30 km.
